# Supplementary material
Source: PubMed Central journal article supplement (PMC3294029)

Supplementary Data to

**“Altered nuclear co-factor switching in retinoic acid resistant variants of  
the PML-RAR $\alpha$  oncoprotein of acute promyelocytic leukemia”**

Farris et al.

## **Supplementary Figure Legends**

**Figure S1.** Protein sequence of His6-tagged RAR $\alpha$  LBD as determined from repetitive N-terminal sequencing.

**Figure S2.** Representative SDS polyacrylamide gel of fractions of wild type RAR $\alpha$  LBD eluted from a Ni-NTA affinity column

**Figure S3.** Size exclusion chromatography analysis of wild type RAR $\alpha$  LBD, performed in the presence and absence of ATRA. Purple trace = RAR 11706a, RAR $\alpha$  in absence of ATRA. The elution volume was 10.38, which corresponds to a molecular weight range of 160-240 kD. The material was highly polydisperse, so there is clearly a range of different molecular species. Light Blue trace= RAR 121906, RAR $\alpha$  in the presence of ATRA. Peaks were obtained at 14.64 and 16.24 mL (elution volume), which corresponded to 50 kD and 29.6 kD, respectively. Protein standards in this run included ovalbumin 121906a (Ova, dark blue trace, Mr = 43 kDa) and bovine serum albumin (BSA, magenta Mr = 66 kDa))

**Figure S1**

| <b>Residue<br/>Number<br/>in<br/>sequence</b> | <b>Amino<br/>acid<br/>identity</b> | <b>pmoles<br/>detected</b> |
|-----------------------------------------------|------------------------------------|----------------------------|
| <b>1</b>                                      | <b>Met</b>                         | <b>4.8</b>                 |
| <b>2</b>                                      | <b>Arg</b>                         | <b>7.1</b>                 |
| <b>3</b>                                      | <b>Gly</b>                         | <b>5.3</b>                 |
| <b>4</b>                                      | <b>Ser</b>                         | <b>2.4</b>                 |
| <b>5</b>                                      | <b>His</b>                         | <b>1.2</b>                 |
| <b>6</b>                                      | <b>His</b>                         | <b>1.7</b>                 |
| <b>7</b>                                      | <b>His</b>                         | <b>2.3</b>                 |
| <b>8</b>                                      | <b>His</b>                         | <b>2.0</b>                 |
| <b>9</b>                                      | <b>His</b>                         | <b>2.1</b>                 |
| <b>10</b>                                     | <b>His</b>                         | <b>1.9</b>                 |

**Figure S2**

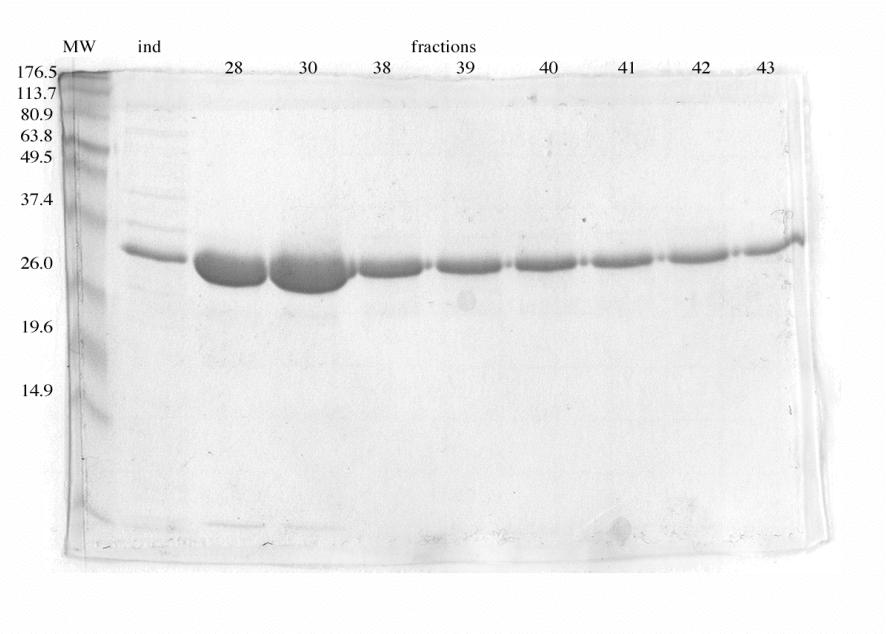

Figure S3

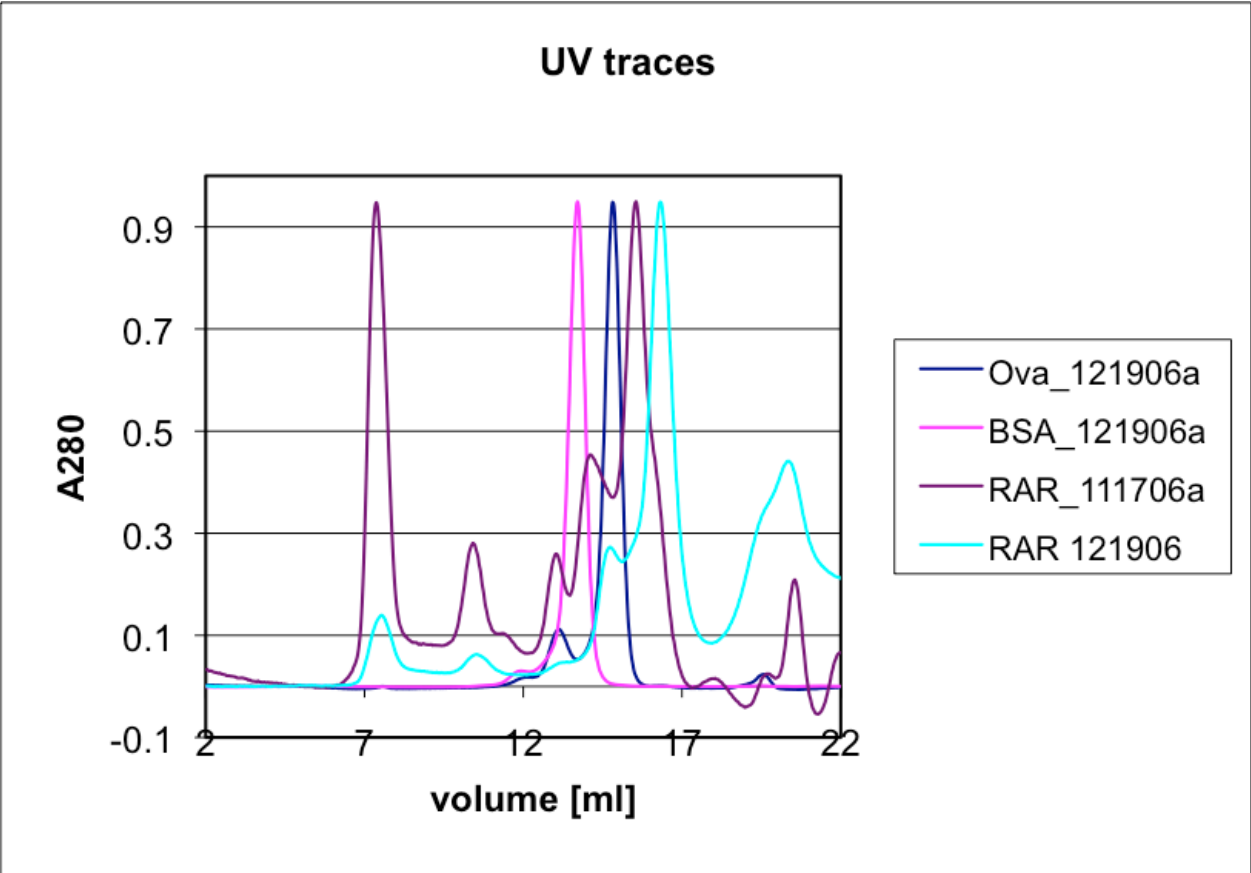

Supplement: NIHMS343339-supplement-Supp_Fig_S1-S3.pdf [file NIHMS343339-supplement-Supp_Fig_S1-S3.pdf]
